# Supplementary material
Source: ML conference proceedings conference paper supplement (https://openaccess.thecvf.com/content/WACV2025/html/Sato_Multi-Task_Learning_of_WACV_2025_paper.html)
Supplement: Supplementary file 1 [file Sato_Multi-Task_Learning_of_WACV_2025_supplemental.pdf]

## Supplementary Materials: Multi-task Learning of Classification and Generation for Set-structured Data

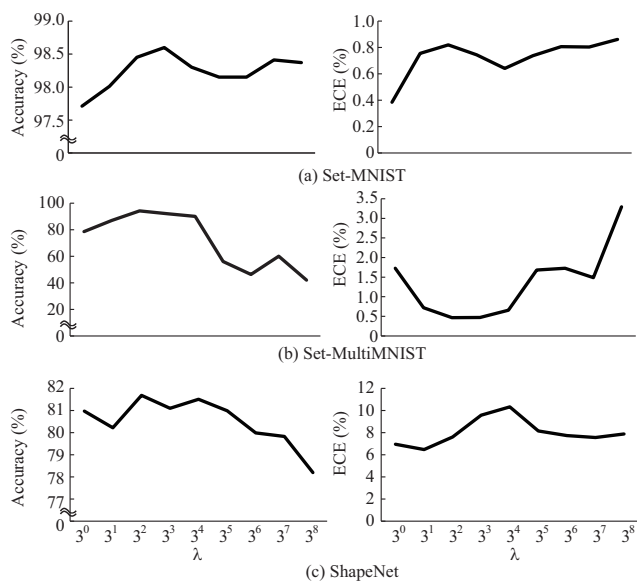

Figure 1. Changes in the performance of the proposed method while varying  $\lambda$ . The horizontal axis is shown on a logarithmic scale with base 3.

### A. Impact of the loss balancing weight $\lambda$

Fig. 1 shows the changes in the performance of the proposed method while varying  $\lambda$ . Both performance metrics form gentle curves in response to the changes in  $\lambda$ , peaking when  $\lambda$  is between  $3^1$  to  $3^4$ . This result suggests the importance of achieving a proper balance between the losses of the discriminative and generative models.
